# Supplementary material for: Clinical and Prognostic Value of Antigen-Presenting Cells with PD-L1/PD-L2 Expression in Ovarian Cancer Patients
Source: MDPI journal article supplement (doi:10.3390/ijms222111563), 2021-10-26
Supplement: s1 [file s1]

# Clinical and Prognostic Value of Antigen-Presenting Cells with PD-L1/PD-L2 Expression in Ovarian Cancer Patients

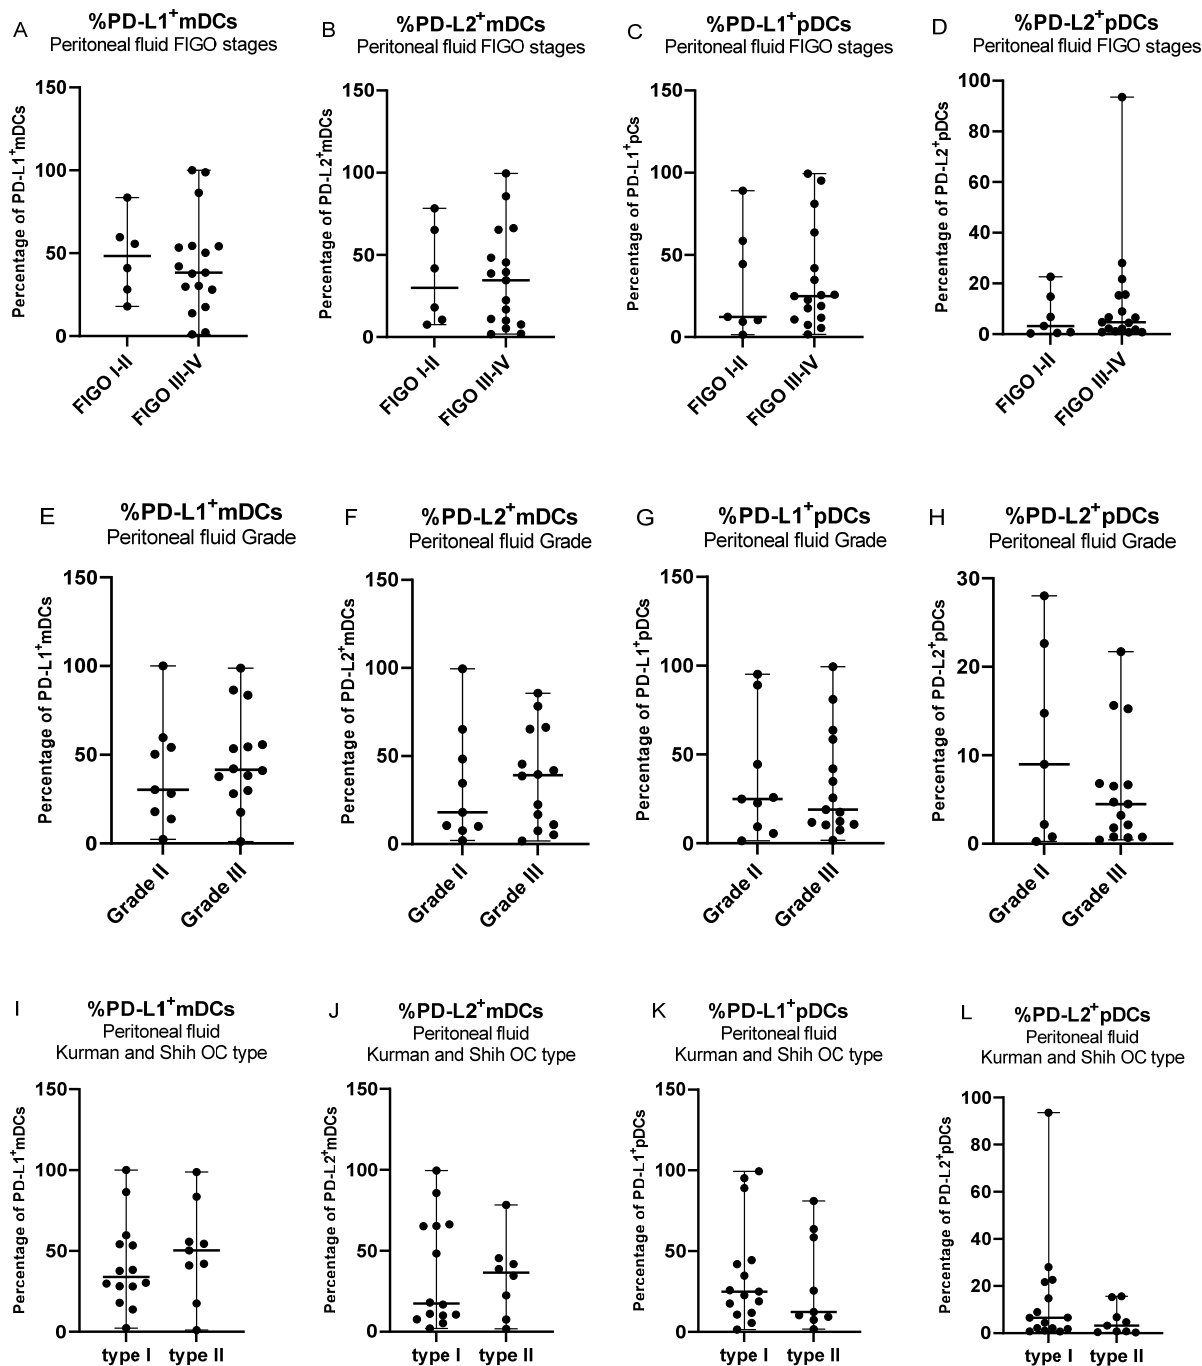

**Figure S1.** Distribution of mDCs and pDCs with PD-L1 and PD-L2 expression in peritoneal fluid of ovarian cancer patients with different FIGO stages (A–D), grade (E–H), and OC types (I–L).

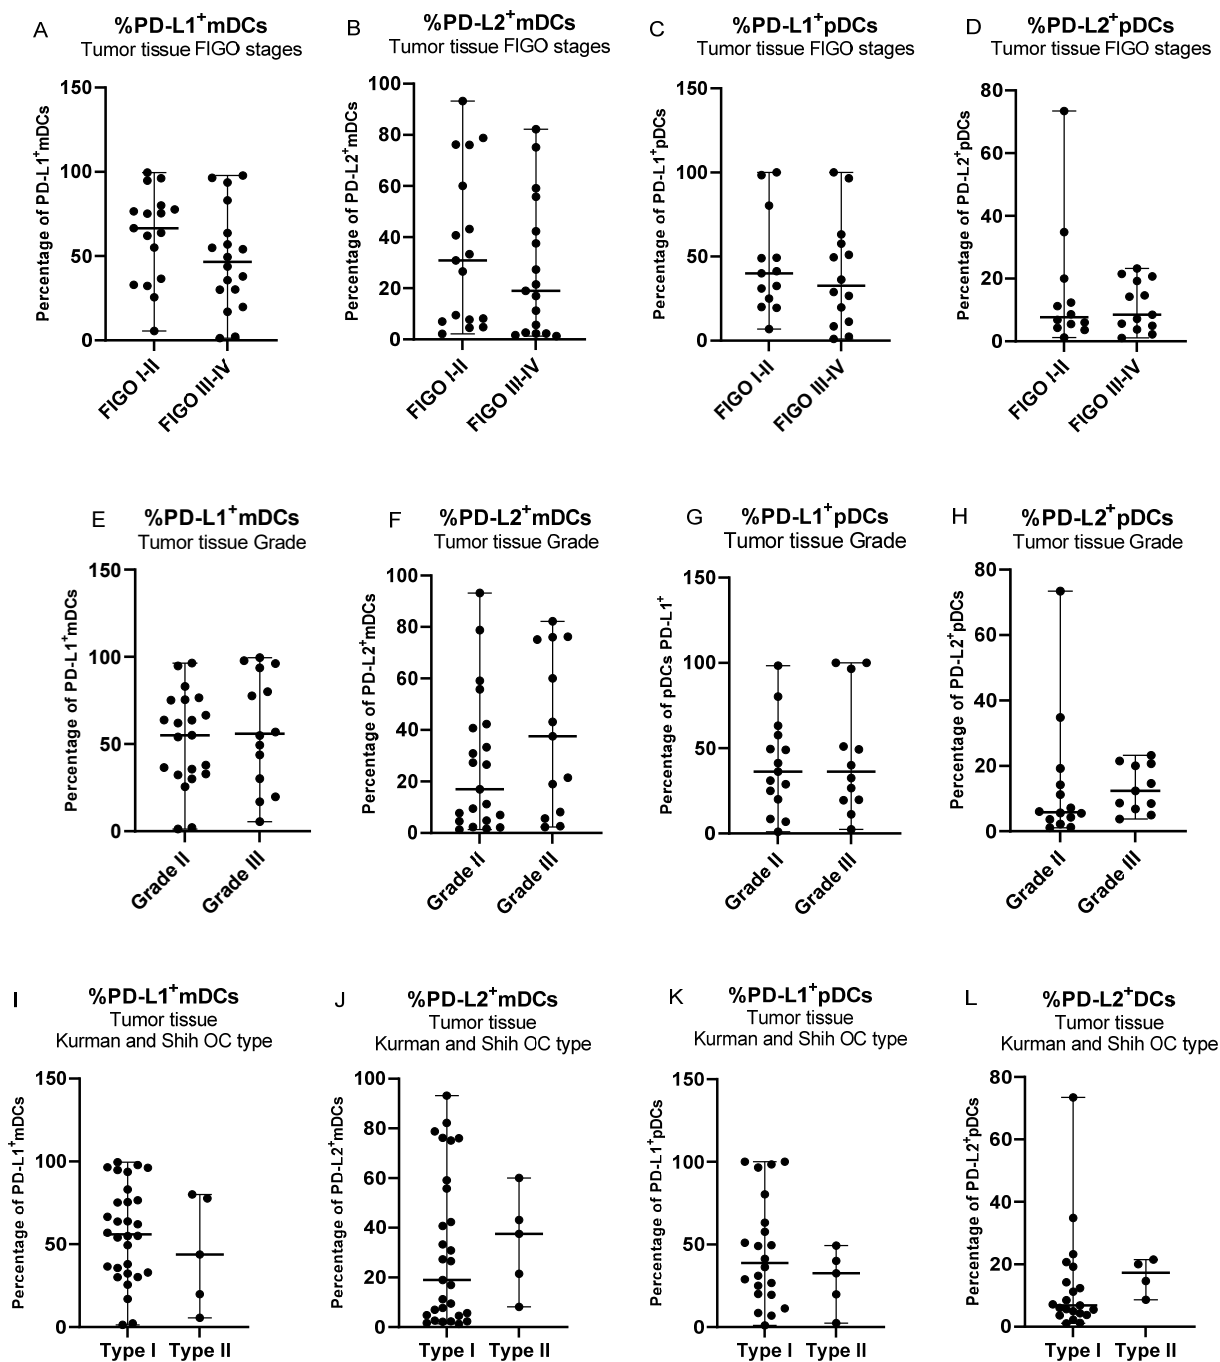

**Figure S2.** Distribution of mDCs and pDCs with PD-L1 and PD-L2 expression in tumor tissue of ovarian cancer patients with different FIGO stages (A–D), grade (E–H), and OC types (I–L).

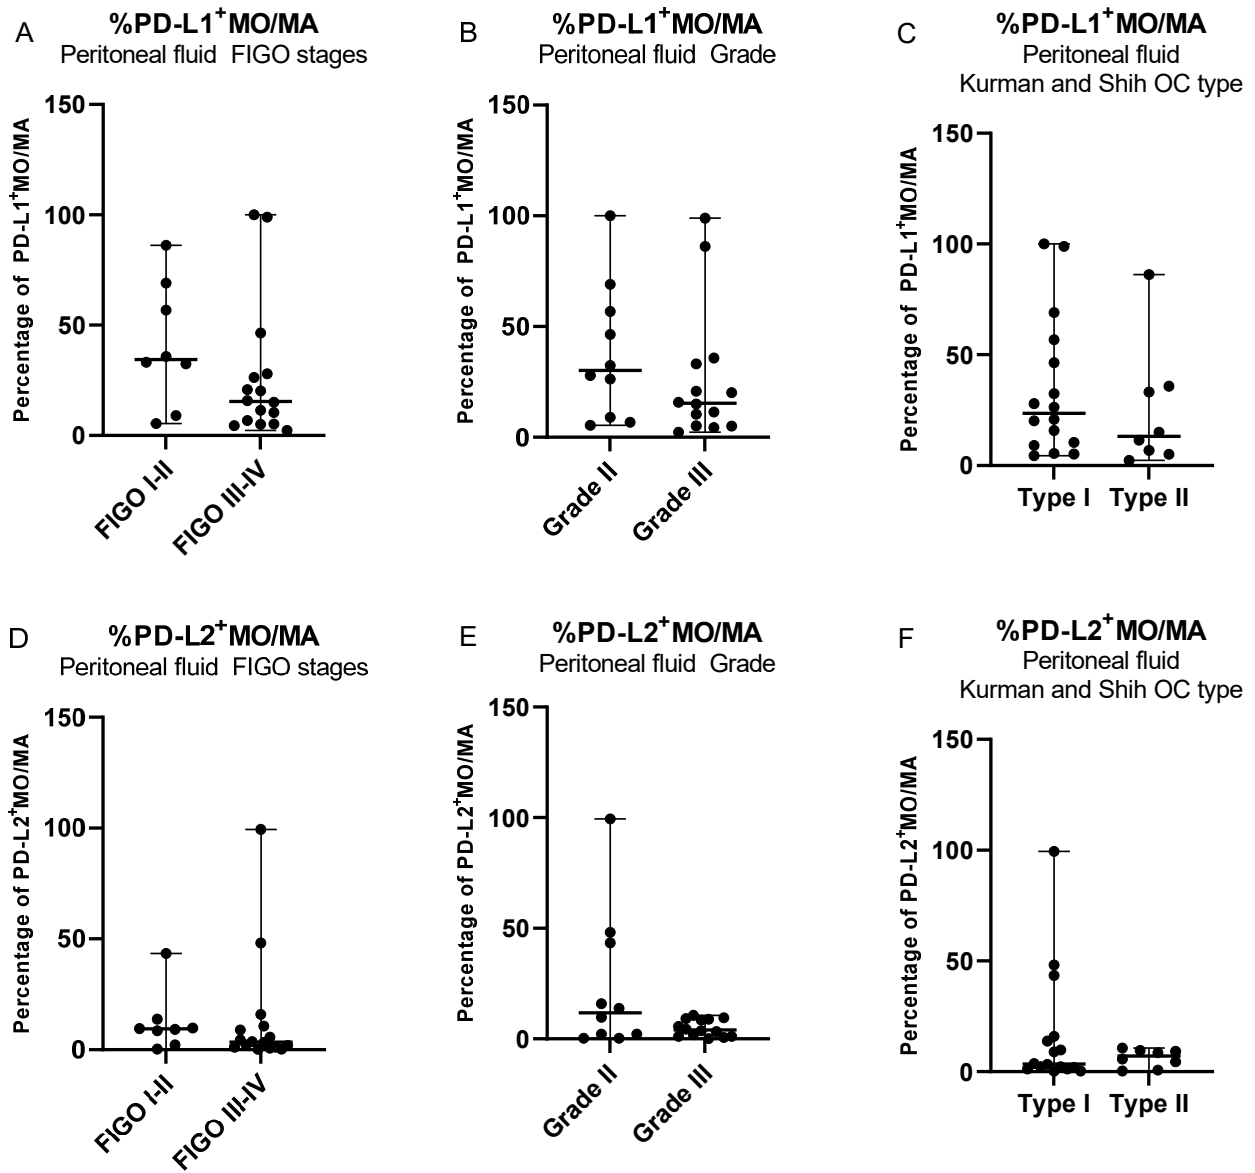

**Figure S3.** Distribution of MO/MA with PD-L1 and PD-L2 expression in peritoneal fluid of ovarian cancer patients with different FIGO stages (A, D), grade (B, E), and OC types (C, F).

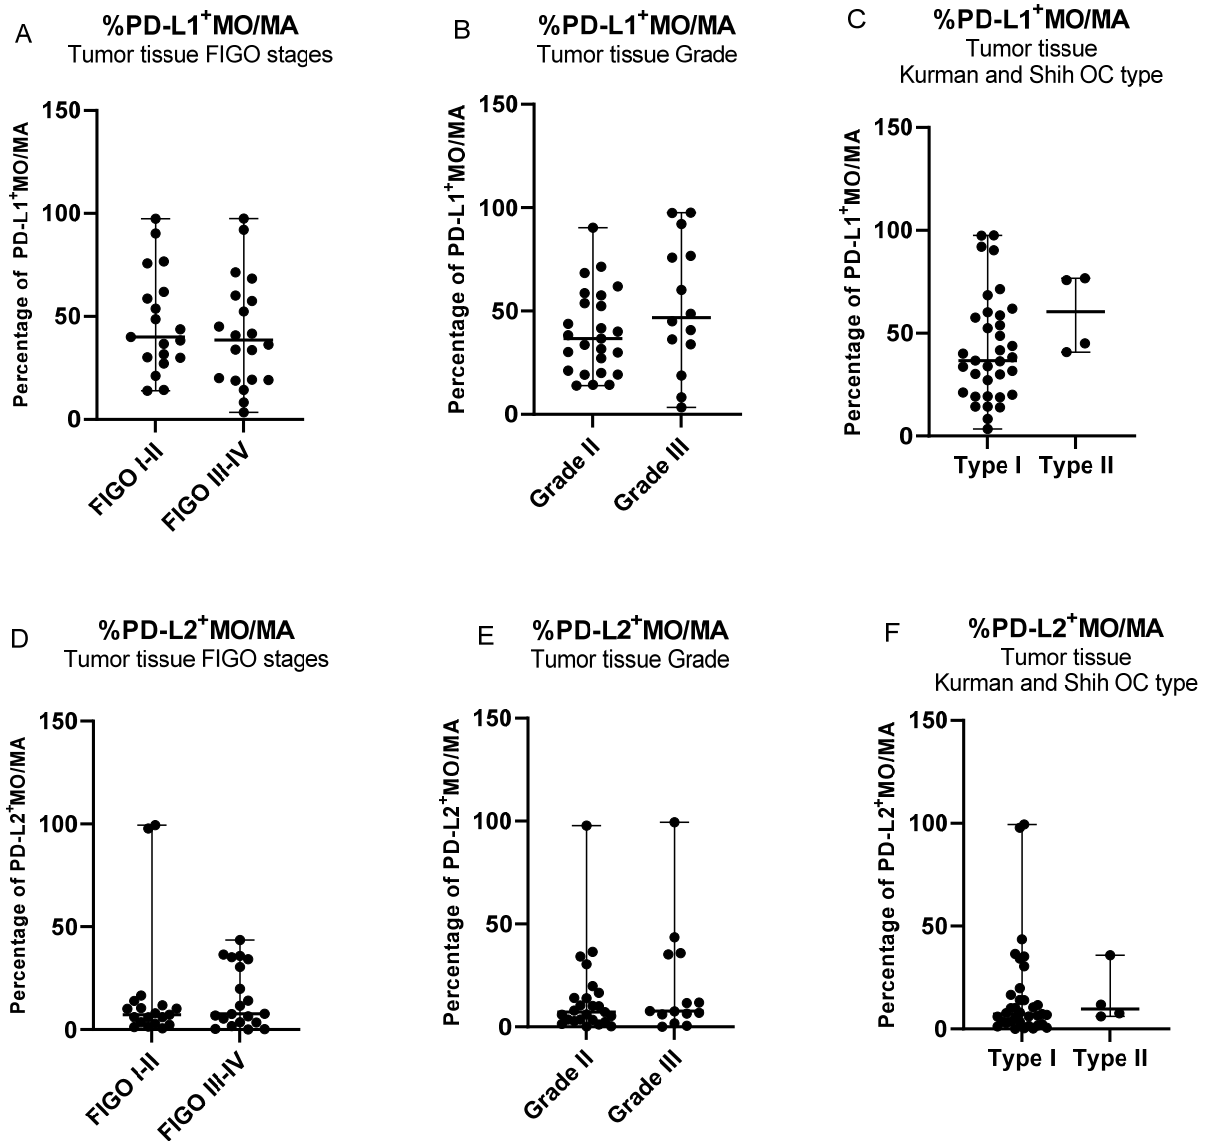

**Figure S4.** Distribution of MO/MA with PD-L1 and PD-L2 expression in tumor tissue of ovarian cancer patients with different FIGO stages (A, D), grade (B E), and OC types (C, F).
